# Supplementary material
Source: PubMed Central journal article supplement (PMC3057843)
Supplement: supp_M110.196428_jbc.M110.196428-1.pdf [file supp_M110.196428_jbc.M110.196428-1.pdf]

## Supplemental Data

### Figures and Figure Legends

**Figure S1: Immunoprecipitation of insect- and mammalian-cell derived cleavage-defective GPC.** Insect High-Five™ cells expressing icd-GPC and Vero cells expressing the identical cleavage-defective GPC (cd-GPC) lacking the FLAG tag, were metabolically labeled and proteins were immunoprecipitated using JUNV-directed MAbs that recognize G1 (BE08, BF11, AA09, AG02 and BF09) (1) and examined by SDS-PAGE. The anti-N MAb BG12 ( $\alpha$ -N) and anti-FLAG MAb M2 were also tested. Top panel demonstrates co-precipitation of SSP with the icd-G1G2 precursor from insect cells, and lower panel shows cd-GPC immunoprecipitated from Vero cells. Molecular-size markers are indicated in kilodaltons (kDa) at left.

**Figure S2: Biosensor analysis of the interaction of MAbs and sTfR with detergent solubilized icd-GPC.** The icd-GPC complex was immobilized on a Biacore CM5 chip in 0.1% DDM and concentration-dependent sensorgrams were analyzed. Representative interactions with JUNV-specific MAbs (1) and soluble TfR from human plasma (American Research Products) are shown. MAbs were injected at a concentration of 500 nM. MAb BF11 (black), BF09 (purple), AA09 (blue), BE08 (red) and AG02 (wine) are directed to JUNV G1. BG12 (cyan) recognizes JUNV N protein ( $\alpha$ -N) and the protein target of AB11 (pink) is unknown. sTfR (orange) was used at 1.5  $\mu$ M.

### Supplemental Data Reference

Sanchez, A., Pifat, D. Y., Kenyon, R. H., J, P. C., McCormick, J. B., and Kiley, M. P. (1989) *J Gen Virol* **70**, 1125-1132

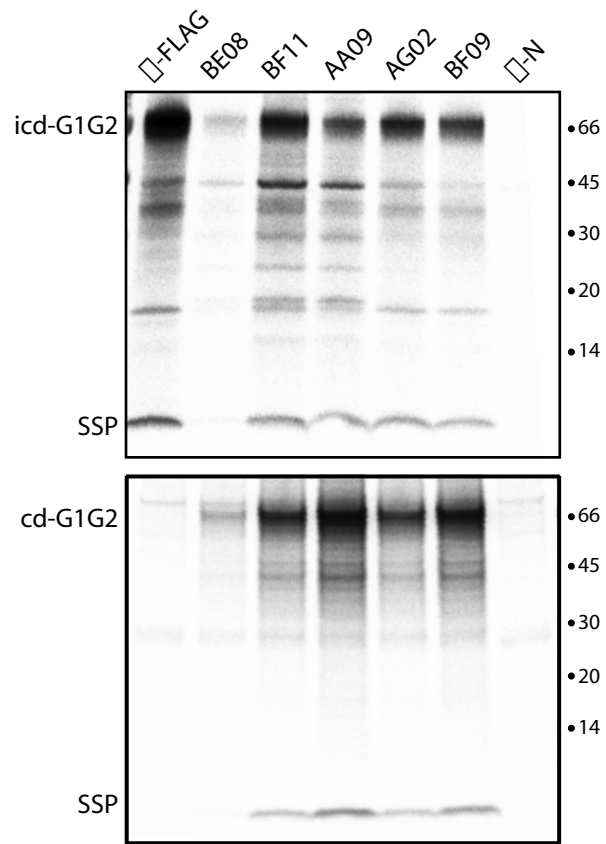

Thomas et al  
Fig. S1

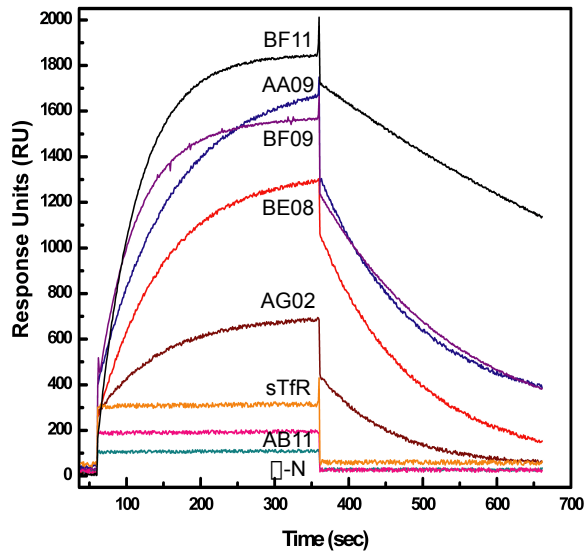

Thomas et al  
Fig. S2
